# Supplementary material
Source: Springer Nature journal article supplement (https://www.springermedizin.de/resource/supplementary/12947_2013_463_MOESM2_ESM.pdf/9555798)

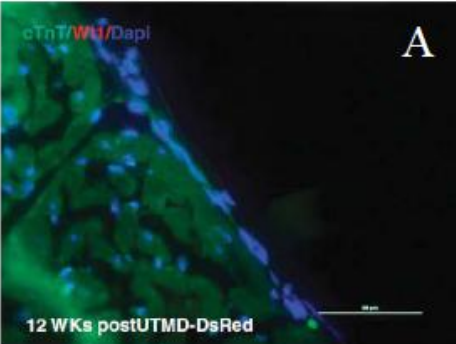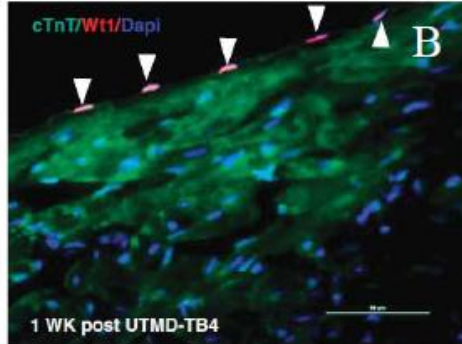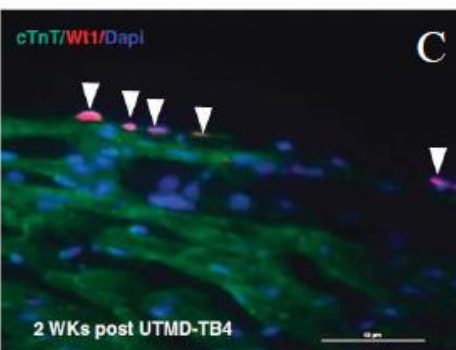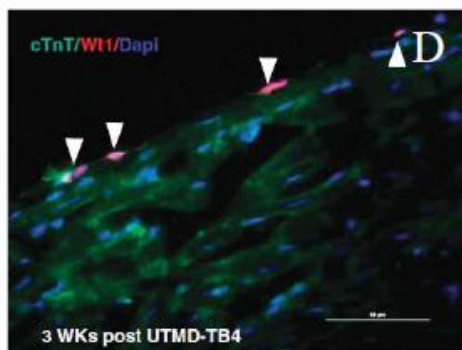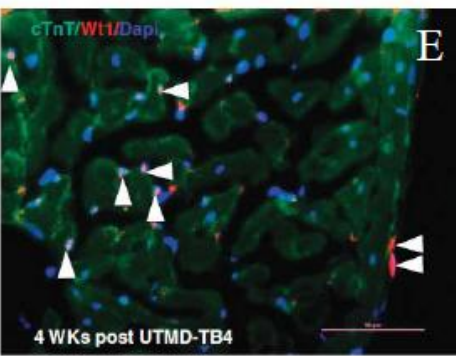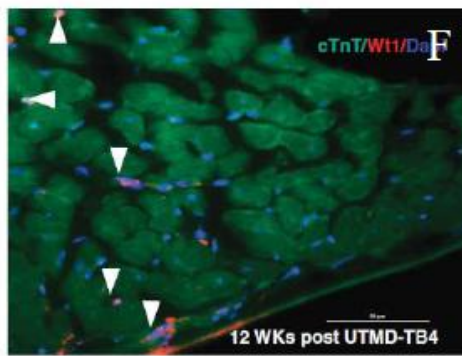

Supplement: MOESM2 [file 9555798]
